# Supplementary material for: Influence of guideline adherence and parameter control on the clinical outcomes in patients with diabetic nephropathy
Source: PubMed Central journal article supplement — BMJ Open Diabetes Res Care. 2020 Jul 15;8(1):e001166. doi: 10.1136/bmjdrc-2019-001166 (PMC7368486; doi:10.1136/bmjdrc-2019-001166), 2020-07-15

**Table S1** Medication regimen and drug contraindications for antihyperglycemic therapy, hypertension control and lipid management in ADA and Chinese guidelines

| Treatment strategies             | 2018 ADA                                                                                                                                                                                                                                                                                                                                                                          | Chinese guidelines                                                                                                                                                                                                                                                                   |
|----------------------------------|-----------------------------------------------------------------------------------------------------------------------------------------------------------------------------------------------------------------------------------------------------------------------------------------------------------------------------------------------------------------------------------|--------------------------------------------------------------------------------------------------------------------------------------------------------------------------------------------------------------------------------------------------------------------------------------|
| <b>Antihyperglycemic Therapy</b> |                                                                                                                                                                                                                                                                                                                                                                                   |                                                                                                                                                                                                                                                                                      |
| <b>Medication regimen</b>        |                                                                                                                                                                                                                                                                                                                                                                                   |                                                                                                                                                                                                                                                                                      |
| Monotherapy                      | In patients with newly diagnosed type 2 diabetes who have A1C <9% (75 mmol/mol), metformin is the preferred initial pharmacologic agent. In patients with metformin contraindications or intolerance, consider another drug, including SGLT-2 inhibitors, GLP-1 RAs, DPP-4 inhibitors, thiazolidinediones, sulfonylureas, basal insulin.                                          | If lifestyle management does not achieve the A1C goal (A1C $\geq$ 7%), consider metformin as first-line therapy. In patients with metformin contraindications or intolerance, consider alpha-glucosidase inhibitors, sulfonylureas, or glinides.                                     |
| Dual Therapy                     | In patients with newly diagnosed type 2 diabetes who have A1C $\geq$ 9% (75 mmol/mol) or if the A1C target is not achieved after approximately 3 months of monotherapy, consider a combination of metformin and any one of the preferred six treatment options: sulfonylureas, thiazolidinediones, DPP-4 inhibitors, SGLT2 inhibitors, GLP-1 receptor agonists, or basal insulin. | If monotherapy does not achieve the A1C goal over 3 months, consider to add another drug among the following options: metformin, sulfonylureas, thiazolidinediones, DPP-4 inhibitors, SGLT2 inhibitors, GLP-1 receptor agonists, glinides, alpha-glucosidase inhibitors, or insulin. |
| Triple Therapy                   | If A1C target is still not achieved after ~ 3 months of dual therapy, proceed to a three-drug combination.                                                                                                                                                                                                                                                                        | If dual therapy does not achieve the A1C goal over 3 months, consider a combination of three drugs among the above antihyperglycemic drugs.                                                                                                                                          |

Combination  
Injectable Therapy

In patients with newly diagnosed type 2 diabetes who are symptomatic and/or have A1C  $\geq 10\%$  (86 mmol/mol) and/or blood glucose levels  $\geq 300\text{mg/dL}$  (16.7 mmol/L), or if A1C target is not achieved after ~ 3 months of triple therapy, consider a combination use of basal insulin and rapid-acting insulin injection before meal or basal insulin and GLP-1 RA or directly changing to premixed insulin (with or without additional agents).

If triple therapy does not achieve the A1C goal over 3 months, consider a combination use of basal insulin and rapid-acting insulin injection before meal or directly changing to premixed insulin (with or without additional agents). Sulfonylureas and glinides should be avoided if combination injectable therapy was used.

Short-term  
intensive insulin -  
therapy

Consider a combination use of basal insulin and rapid-acting insulin injection before meal or changing to premixed insulin in patients with newly diagnosed type 2 diabetes who are symptomatic and/or have A1C  $\geq 9\%$  (75 mmol/mol) and/or blood glucose levels  $\geq 200\text{mg/dL}$  (11.1 mmol/L).

#### Drug contraindications

Metformin: discontinue if eGFR  $< 30$ ; Acarbose: Avoid if eGFR  $< 30$ ; Glyburide: Avoid use in patients with renal impairment

Metformin: avoid if eGFR  $< 45$ ; Glyburide: Avoid if eGFR  $< 60$ ; Glimepiride: avoid if eGFR  $< 45$ ; Glipizide: avoid if eGFR  $< 30$ ; Gliquidone: avoid if eGFR  $< 15$ ; Gliclazide: avoid if eGFR  $< 30$ ; Acarbose: Avoid if eGFR  $< 30$ ; Saxagliptin: avoid if eGFR  $< 30$

### Hypertension Control

#### Medication regimen

Monotherapy

If initial BP between 140/90 mmHg and 160/100 mmHg, start one agent: ACE inhibitors, ARBs, CCBs, diuretics.

If initial BP between 140/90 mmHg and 160/100 mmHg, start one agent: ACE inhibitors, ARBs, diuretics, calcium channel blockers,  $\beta$ -receptor blockers.

|                               |                                                                                                                                                     |                                                                                                                                                                                             |
|-------------------------------|-----------------------------------------------------------------------------------------------------------------------------------------------------|---------------------------------------------------------------------------------------------------------------------------------------------------------------------------------------------|
| Dual Therapy                  | If initial BP $\geq$ 160/100 mm Hg or monotherapy dose not meeting target, start drug from 2 of 3 options: ACE inhibitors or ARBs, CCBs, diuretics. | If BP $\geq$ 160/100 mm Hg or monotherapy dose not meeting target, start drug from 2 of 4 options: ACE inhibitors or ARBs, diuretics, calcium channel blockers, $\beta$ -receptor blockers. |
| Triple Therapy                | If dual Therapy dose not meeting target, add agent from complementary drug class: ACE inhibitors or ARBs, CCBs, diuretics.                          | If dual Therapy dose not meeting target, start three of the above antihypertensive drugs.                                                                                                   |
| Quadruple therapy             | Not meeting target or adverse effects using a drug from each of three classes, consider addition of mineralocorticoid receptor antagonist.          | If triple Therapy dose not meeting target, start four of the above antihypertensive drugs.                                                                                                  |
| <b>Drug contraindications</b> | -                                                                                                                                                   | Ramipril: avoid if eGFR <15; Lercanidipine: avoid if eGFR <30; Indapamide: avoid if eGFR <30                                                                                                |

---

## Lipid Management

### Medication regimen

|                                            |                                                                                                                                                                                                                                         |                                                                                                                            |
|--------------------------------------------|-----------------------------------------------------------------------------------------------------------------------------------------------------------------------------------------------------------------------------------------|----------------------------------------------------------------------------------------------------------------------------|
| Statin                                     | For patients of all ages with diabetes and ASCVD; For patients with diabetes and additional ASCVD risk factors*                                                                                                                         | If lipid level exceed the treatment target, consider statin as First-line drug.                                            |
| Statin and additional LDL lowering therapy | For patients with diabetes and atherosclerotic cardiovascular disease, if LDL cholesterol is $\geq$ 70 mg/dL on maximally tolerated statin dose, consider adding additional LDL lowering therapy (such as ezetimibe or PCSK9 inhibitor) | If the cholesterol level dose not meeting target using statin, consider adding other lipid-lowing drug, such as ezetimibe. |
| Fibrate                                    | For patients with fasting triglyceride levels $\geq$ 500 mg/dL (5.7 mmol/L)                                                                                                                                                             | For patients with fasting triglyceride levels $\geq$ 500 mg/dL (5.7 mmol/L)                                                |
| <b>Drug contraindications</b>              | -                                                                                                                                                                                                                                       | Fluvastatin: avoid if eGFR <30; Rosuvastatin: avoid if eGFR <30;                                                           |

---

Fenofibrate: avoid if eGFR <30

---

Note: treatment target: HbA1C <7%; BP <130/80mmHg; LDL-C <1.8mmol/L for very-high-risk, LDL-C <2.6mmol/L for high-risk. If treatment tolerated and target achieved, consider continuing therapy. For drug contraindication, we only list the drugs that required discontinuation at low eGFR but did not contain the drugs with required dose adjustment or no dosage adjustment necessary at low eGFR.

\*ASCVD risk factors include LDL cholesterol  $\geq$ 100 mg/dL (2.6 mmol/L), high blood pressure, smoking, **chronic kidney disease**, albuminuria, and family history of premature ASCVD.

HbA1c, glycosylated hemoglobin; LDL-C, low-density lipoprotein cholesterol; eGFR, estimated glomerular filtration rate; CCB, calcium channel blockers; ASCVD, atherosclerotic cardiovascular disease.

**Table S2** Antihypertensive treatment regimen and BP control target for ADA guideline from 2003 to 2018 versions

| ADA versions                        | 2003-2007ADA                                                                                                                                                                                                                                                                                                                                                                | 2008-2012ADA                                                                                                                                                                                                                                                                                                                                                                                                                                                     | 2013/2014ADA                                                                                                                                                                                                                                                                                                                                                                                                                                            | 2015/2016ADA                                                                                                                                                                                                                                                                                                                                                                                                                                                        | 2017/2018ADA                                                     |
|-------------------------------------|-----------------------------------------------------------------------------------------------------------------------------------------------------------------------------------------------------------------------------------------------------------------------------------------------------------------------------------------------------------------------------|------------------------------------------------------------------------------------------------------------------------------------------------------------------------------------------------------------------------------------------------------------------------------------------------------------------------------------------------------------------------------------------------------------------------------------------------------------------|---------------------------------------------------------------------------------------------------------------------------------------------------------------------------------------------------------------------------------------------------------------------------------------------------------------------------------------------------------------------------------------------------------------------------------------------------------|---------------------------------------------------------------------------------------------------------------------------------------------------------------------------------------------------------------------------------------------------------------------------------------------------------------------------------------------------------------------------------------------------------------------------------------------------------------------|------------------------------------------------------------------|
| BP control target for DN patients   | 130/80mmHg                                                                                                                                                                                                                                                                                                                                                                  | 130/80mmHg                                                                                                                                                                                                                                                                                                                                                                                                                                                       | 140/80mmHg                                                                                                                                                                                                                                                                                                                                                                                                                                              | 140/90mmHg                                                                                                                                                                                                                                                                                                                                                                                                                                                          | 130/80mmHg                                                       |
| BP level for initial drug treatment | BP $\geq$ 140/90 mmHg                                                                                                                                                                                                                                                                                                                                                       |                                                                                                                                                                                                                                                                                                                                                                                                                                                                  | BP $\geq$ 140/80 mmHg                                                                                                                                                                                                                                                                                                                                                                                                                                   | BP >140/90 mmHg                                                                                                                                                                                                                                                                                                                                                                                                                                                     | BP >140/90 mmHg start one drug; BP >160/100 mmHg start two drugs |
| Treatment regimen                   | <p>1. In the treatment of both micro- and macroalbuminuria, either ACE inhibitors or ARBs should be used except during pregnancy.</p> <p>2. The use of DCCBs in nephropathy should be restricted to additional therapy to further lower blood pressure in patients already treated with ACE inhibitors or ARBs.</p> <p>3. In patients unable to tolerate ACE inhibitors</p> | <p>1. In the treatment of the nonpregnant patient with micro- or macroalbuminuria, either ACE inhibitors or ARBs should be used.</p> <p>2. Other drugs, such as diuretics, calcium channel blockers, and <math>\beta</math>-blockers, should be used as additional therapy to further lower blood pressure in patients already treated with ACE inhibitors or ARBs, or as alternate therapy in the rare individual unable to tolerate ACE inhibitors or ARBs</p> | <p>1. Either an ACE inhibitor or ARB is suggested for the treatment of the nonpregnant patient with modestly elevated urinary albumin excretion (30-299 mg/day) and is recommended for those with urinary albumin excretion &gt; 300 mg/day.</p> <p>2. Diuretics, calcium channel blockers, and <math>\beta</math>-blockers can be used as additional therapy to further lower blood pressure in patients already treated with maximum doses of ACE</p> | <p>1. An ACE inhibitor or ARB is the recommended first-line treatment for hypertension in patients with diabetes and urinary albumin-to-creatinine ratio <math>\geq</math>300 mg/g creatinine or 30-299 mg/g creatinine. If one class is not tolerated, the other should be substituted.</p> <p>2. Antihypertensive drugs including ACE inhibitors, ARB, thiazide-like diuretics, or dihydropyridine calcium channel blockers.</p> <p>3. The combination of ACE</p> |                                                                  |

|  |                                                                              |  |                                                                                                                                                                                  |                                       |
|--|------------------------------------------------------------------------------|--|----------------------------------------------------------------------------------------------------------------------------------------------------------------------------------|---------------------------------------|
|  | and/or ARBs, consider the use of non-DCCBs, $\beta$ -blockers, or diuretics. |  | inhibitors or ARBs or as alternate therapy in the rare individual unable to tolerate ACE inhibitors and ARBs.<br>3. The combination of ACE inhibitors and ARB should be avoided. | inhibitors and ARB should be avoided. |
|--|------------------------------------------------------------------------------|--|----------------------------------------------------------------------------------------------------------------------------------------------------------------------------------|---------------------------------------|

Note: The 2007, 2012, 2014, 2016 and 2018 versions of ADA were selected as representative of each group to study the association between guideline adherence and BP-goal achieving rate.

**Table S3** Guideline adherence rate for five groups of ADA guidelines and associated BP target achievement rate

| <b>Group</b> | <b>Representative ADA version</b> | <b>BP control target for DN patients</b> | <b>Guideline adherence rate</b> | <b>Target achievement rate for adherence</b> | <b>Target achievement rate for non-adherence</b> |
|--------------|-----------------------------------|------------------------------------------|---------------------------------|----------------------------------------------|--------------------------------------------------|
| 2017/2018ADA | 2018ADA                           | 130/80mmHg                               | 36.00%                          | 34.31%                                       | 17.00%                                           |
| 2015/2016ADA | 2016ADA                           | 140/90mmHg                               | 55.12%                          | 55.71%                                       | 38.43%                                           |
| 2013/2014ADA | 2014ADA                           | 140/80mmHg                               | 50.97%                          | 42.63%                                       | 26.71%                                           |
| 2008-2012ADA | 2012ADA                           | 130/80mmHg                               | 41.80%                          | 31.21%                                       | 12.71%                                           |
| 2003-2007ADA | 2007ADA                           | 130/80mmHg                               | 44.49%                          | 34.06%                                       | 19.46%                                           |

**Table S4** Hazard ratios (95% confidence intervals) of progression to ESKD by trajectory group of each clinical parameter in the first two years of follow-up.

| parameter | longitudinal trajectory | Total number | Number of ESKD | Incidence rate of ESKD | Unadjusted         | P value | Model 1            | P value | Model 2           | P value | Model 3           | P value |
|-----------|-------------------------|--------------|----------------|------------------------|--------------------|---------|--------------------|---------|-------------------|---------|-------------------|---------|
| PRO       | Class_1                 | 535          | 111            | 20.75%                 | Reference          |         | Reference          |         | Reference         |         | Reference         |         |
|           | Class_2                 | 132          | 82             | 62.12%                 | 7.16 (5.31-9.66)   | <0.001  | 7.13 (5.29-9.62)   | <0.001  | 4.83 (3.41-6.85)  | <0.001  | 4.41 (3.08-6.30)  | <0.001  |
|           | Class_3                 | 35           | 25             | 71.43%                 | 13.35 (8.50-20.97) | <0.001  | 13.39 (8.51-21.08) | <0.001  | 8.86 (5.17-15.19) | <0.001  | 8.29 (4.81-14.28) | <0.001  |
|           | Class_4                 | 20           | 12             | 60.00%                 | 10.36 (5.62-19.08) | <0.001  | 10.52 (5.68-19.48) | <0.001  | 8.68 (4.06-18.55) | <0.001  | 7.46 (3.45-16.14) | <0.001  |
| LDL-C     | Class_1                 | 386          | 81             | 20.98%                 | Reference          |         | Reference          |         | Reference         |         | Reference         |         |
|           | Class_2                 | 237          | 84             | 35.44%                 | 1.79 (1.32-2.42)   | <0.001  | 1.78 (1.31-2.42)   | <0.001  | 2.11 (1.46-3.06)  | <0.001  | 1.97 (1.37-2.85)  | <0.001  |
|           | Class_3                 | 75           | 44             | 58.67%                 | 4.37 (3.02-6.32)   | <0.001  | 4.37 (3.02-6.33)   | <0.001  | 4.23 (2.56-6.99)  | <0.001  | 3.42 (2.04-5.71)  | <0.001  |
|           | Class_4                 | 13           | 9              | 69.23%                 | 8.83 (4.40-17.70)  | <0.001  | 8.77 (4.37-17.61)  | <0.001  | 7.65 (2.69-21.74) | <0.001  | 5.84 (2.01-16.96) | 0.001   |
| SBP       | Class_1                 | 235          | 61             | 25.96%                 | Reference          |         | Reference          |         | Reference         |         | Reference         |         |
|           | Class_2                 | 318          | 114            | 35.85%                 | 1.39 (1.02-1.90)   | 0.039   | 1.37 (0.99-1.88)   | 0.055   | 1.13 (0.81-1.58)  | 0.468   | 1.08 (0.77-1.51)  | 0.647   |
|           | Class_3                 | 24           | 16             | 66.67%                 | 3.41 (1.96-5.92)   | <0.001  | 3.36 (1.90-5.94)   | <0.001  | 2.27 (1.21-4.26)  | 0.010   | 2.17 (1.16-4.06)  | 0.016   |
| UA        | Class_1                 | 137          | 17             | 12.41%                 | Reference          |         | Reference          |         | Reference         |         | Reference         |         |
|           | Class_2                 | 306          | 82             | 26.80%                 | 2.57 (1.52-4.33)   | <0.001  | 2.69 (1.58-4.56)   | <0.001  | 2.10 (1.12-3.94)  | 0.021   | 1.31 (0.76-2.26)  | 0.277   |
|           | Class_3                 | 226          | 90             | 39.82%                 | 4.69 (2.79-7.90)   | <0.001  | 5.03 (2.96-8.55)   | <0.001  | 2.69 (1.38-5.25)  | 0.004   | 1.35 (0.75-2.42)  | 0.126   |
|           | Class_4                 | 68           | 42             | 61.76%                 | 7.32 (4.15-12.9)   | <0.001  | 8.18 (4.56-14.68)  | <0.001  | 3.76 (1.79-7.89)  | <0.001  | 1.94 (1.00-3.74)  | 0.049   |



| HbA1c | Class_1 | 290 | 86 | 29.66% | Reference        |       | Reference        |       | Reference        |       | Reference        |       |
|-------|---------|-----|----|--------|------------------|-------|------------------|-------|------------------|-------|------------------|-------|
|       | Class_2 | 292 | 97 | 33.22% | 1.23 (0.92-1.65) | 0.167 | 1.22 (0.91-1.64) | 0.191 | 1.18 (0.85-1.66) | 0.325 | 1.23 (0.88-1.72) | 0.220 |
|       | Class_3 | 111 | 32 | 28.83% | 1.20 (0.80-1.80) | 0.384 | 1.18 (0.78-1.79) | 0.433 | 1.20 (0.75-1.92) | 0.438 | 1.21 (0.76-1.93) | 0.427 |
|       | Class 4 | 31  | 10 | 32.26% | 1.42 (0.74-2.74) | 0.295 | 1.42 (0.74-2.74) | 0.296 | 1.35 (0.66-2.78) | 0.409 | 1.36 (0.66-2.80) | 0.407 |

Note: Model 1 adjusted for age, sex. Model 2 further adjusted for the visit number during follow-up period and the laboratory test results (among HbA1c, SBP, DBP, TC, TG, LDL-C, HDL-C, UA) measured at baseline except selected parameter. Model 3 further adjusted for the baseline eGFR

PRO, Proteinuria; HbA1c, glycosylated hemoglobin; HDL-C, high-density lipoprotein cholesterol; LDL-C, low-density lipoprotein cholesterol; eGFR, estimated glomerular filtration rate; SBP, systolic blood pressure; DBP, diastolic blood pressure; TC, total cholesterol; TG, triglyceride; UA, uric acid.

**Table S5** Hazard ratios (95% confidence intervals) of progression to ESKD by trajectory group of each clinical parameter in the first three years of follow-up

| parameter | subgroup | Total number | Number of ESKD | Incidence rate of ESKD | Unadjusted         | P value | Model 1            | P value | Model 2           | P value | Model 3            | P value |
|-----------|----------|--------------|----------------|------------------------|--------------------|---------|--------------------|---------|-------------------|---------|--------------------|---------|
| PRO       | Class_1  | 430          | 73             | 16.98%                 | Reference          |         | Reference          |         | Reference         |         | Reference          |         |
|           | Class_2  | 96           | 48             | 50.00%                 | 6.08 (4.17-8.86)   | <0.001  | 6.06 (4.15-8.84)   | <0.001  | 4.60 (2.92-7.24)  | <0.001  | 4.04 (2.55-6.40)   | <0.001  |
|           | Class_3  | 31           | 23             | 74.19%                 | 15.53 (9.44-25.56) | <0.001  | 15.31 (9.29-25.22) | <0.001  | 12.01(6.67-21.65) | <0.001  | 10.09 (5.55-18.34) | <0.001  |
|           | Class_4  | 11           | 4              | 36.36%                 | 9.00 (3.24-25.04)  | <0.001  | 9.23 (3.30-25.81)  | <0.001  | 7.10 (2.11-23.82) | 0.002   | 5.31 (1.55-18.13)  | 0.008   |
| LDL-C     | Class_1  | 157          | 19             | 12.10%                 | Reference          |         | Reference          |         | Reference         |         | Reference          |         |
|           | Class_2  | 304          | 77             | 25.33%                 | 2.02 (1.22-3.33)   | 0.006   | 1.98 (1.20-3.28)   | 0.008   | 1.93 (1.09-3.40)  | 0.023   | 1.85 (1.05-3.27)   | 0.033   |
|           | Class_3  | 91           | 36             | 39.56%                 | 3.76 (2.15-6.55)   | <0.001  | 3.74 (2.14-6.53)   | <0.001  | 4.45 (2.20-8.98)  | <0.001  | 3.44 (1.69-7.01)   | 0.001   |
|           | Class_4  | 15           | 10             | 66.67%                 | 10.40 (4.81-22.51) | <0.001  | 9.84 (4.50-21.53)  | <0.001  | 9.09 (3.09-26.73) | <0.001  | 5.92 (1.97-17.81)  | 0.002   |
| SBP       | Class_1  | 101          | 16             | 15.84%                 | Reference          |         | Reference          |         | Reference         |         | Reference          |         |
|           | Class_2  | 336          | 94             | 27.98%                 | 2.25 (1.32-3.84)   | 0.003   | 2.17 (1.27-3.73)   | 0.005   | 2.02 (1.14-3.57)  | 0.016   | 1.89 (1.07-3.33)   | 0.029   |
|           | Class_3  | 54           | 22             | 40.74%                 | 2.85 (1.49-5.44)   | 0.002   | 2.65 (1.36-5.15)   | 0.004   | 2.53 (1.23-5.21)  | 0.012   | 2.26 (1.11-4.62)   | 0.025   |
| UA        | Class_1  | 113          | 12             | 10.62%                 | Reference          |         | Reference          |         | Reference         |         | Reference          |         |
|           | Class_2  | 245          | 50             | 20.41%                 | 2.33 (1.24-4.37)   | 0.009   | 2.40 (1.27-4.55)   | 0.007   | 1.77 (0.88-3.57)  | 0.109   | 1.21 (0.59-2.48)   | 0.604   |
|           | Class_3  | 145          | 49             | 33.79%                 | 4.45 (2.36-8.39)   | <0.001  | 4.72 (2.47-8.99)   | <0.001  | 2.72 (1.28-5.76)  | 0.009   | 1.84 (0.87-3.86)   | 0.109   |
|           | Class_4  | 76           | 37             | 48.68%                 | 8.10 (4.20-15.61)  | <0.001  | 8.76 (4.47-17.18)  | <0.001  | 5.07 (2.28-11.28) | <0.001  | 2.92 (1.31-6.48)   | 0.009   |

| HbA1c | Class_1 | 208 | 46 | 22.12% | Reference        |       | Reference        |       | Reference        |       | Reference        |       |
|-------|---------|-----|----|--------|------------------|-------|------------------|-------|------------------|-------|------------------|-------|
|       | Class_2 | 234 | 66 | 28.21% | 1.42 (0.98-2.08) | 0.067 | 1.38 (0.94-2.03) | 0.096 | 1.11 (0.72-1.72) | 0.624 | 1.23 (0.79-1.90) | 0.356 |
|       | Class_3 | 100 | 25 | 25.00% | 1.45 (0.89-2.37) | 0.139 | 1.38 (0.84-2.28) | 0.207 | 1.33 (0.78-2.29) | 0.298 | 1.47 (0.85-2.54) | 0.170 |
|       | Class 4 | 26  | 7  | 26.92% | 1.57 (0.71-3.48) | 0.269 | 1.57 (0.71-3.49) | 0.268 | 1.62 (0.70-3.74) | 0.257 | 1.77 (0.76-4.15) | 0.187 |

Note: Model 1 adjusted for age, sex. Model 2 further adjusted for the visit number during follow-up period and the laboratory test results (among HbA1c, SBP, DBP, TC, TG, LDL-C, HDL-C, UA) measured at baseline except selected parameter. Model 3 further adjusted for the baseline eGFR.

PRO, Proteinuria; HbA1c, glycosylated hemoglobin; HDL-C, high-density lipoprotein cholesterol; LDL-C, low-density lipoprotein cholesterol; eGFR, estimated glomerular filtration rate; SBP, systolic blood pressure; DBP, diastolic blood pressure; TC, total cholesterol; TG, triglyceride; UA, uric acid.

**Figure S1** Flowchart of patient enrollment and patient's timeline. (A) Inclusion and exclusion criteria for study population. (B) One outpatient visit of a patient is selected as a sample (dash-line box). Each sample includes diagnosis, laboratory tests and prescription of the patient, so there are multiple samples for one patient. According to the actual clinical situation, the laboratory tests related to current visit are selected from 14 days ago to 3 days later. Short-term control effect is evaluated by the clinical parameter control in 3-6 months of treatment, while long-term outcome is evaluated by ESKD.

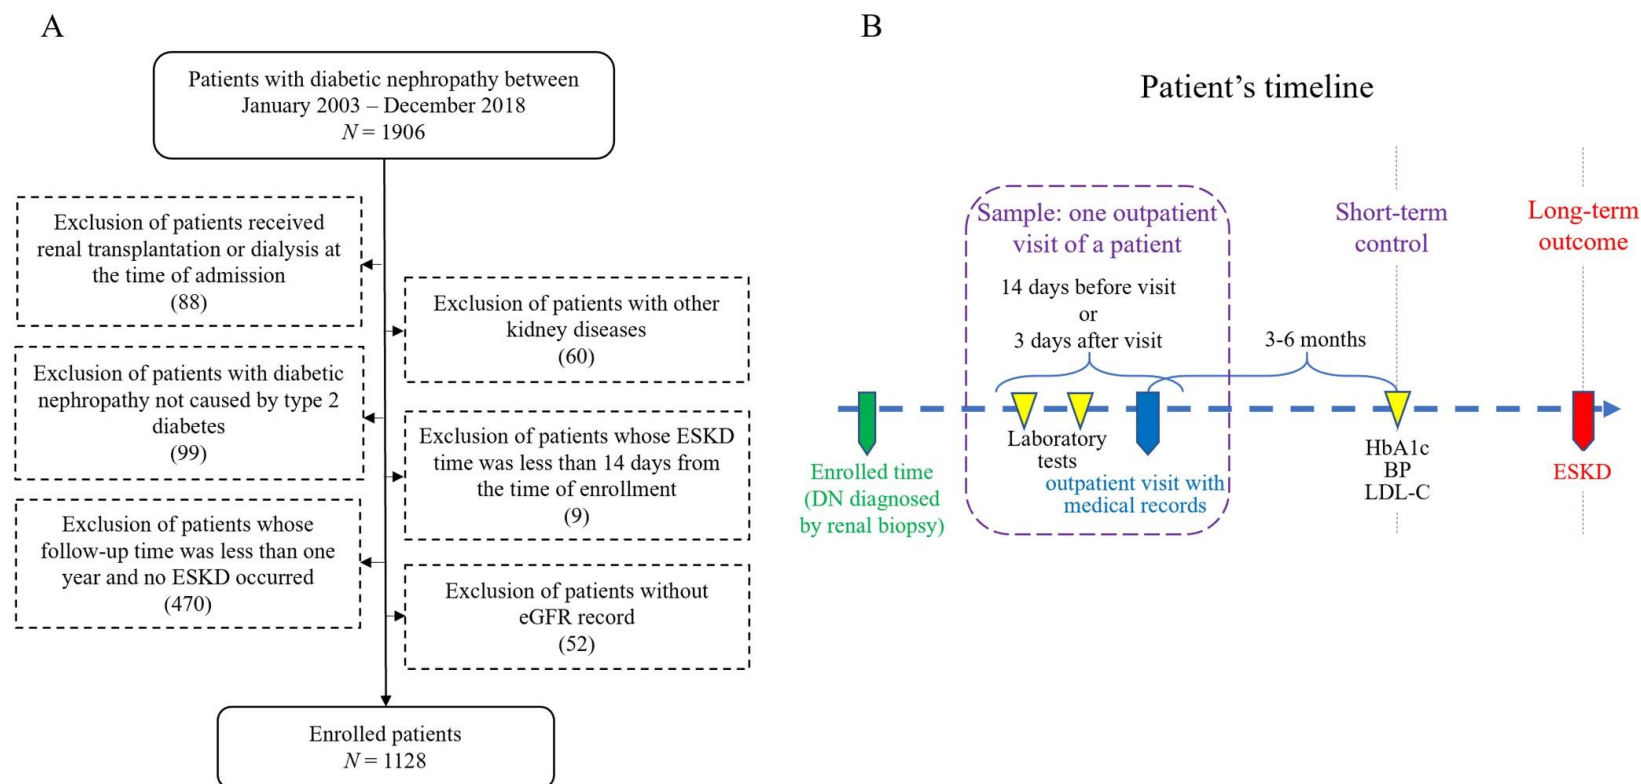

**Figure S2** Flowchart of sample inclusion when evaluating the influence of guideline adherence on short-term/long-term outcome. Taking the antihyperglycemic therapy of ADA guideline for example.

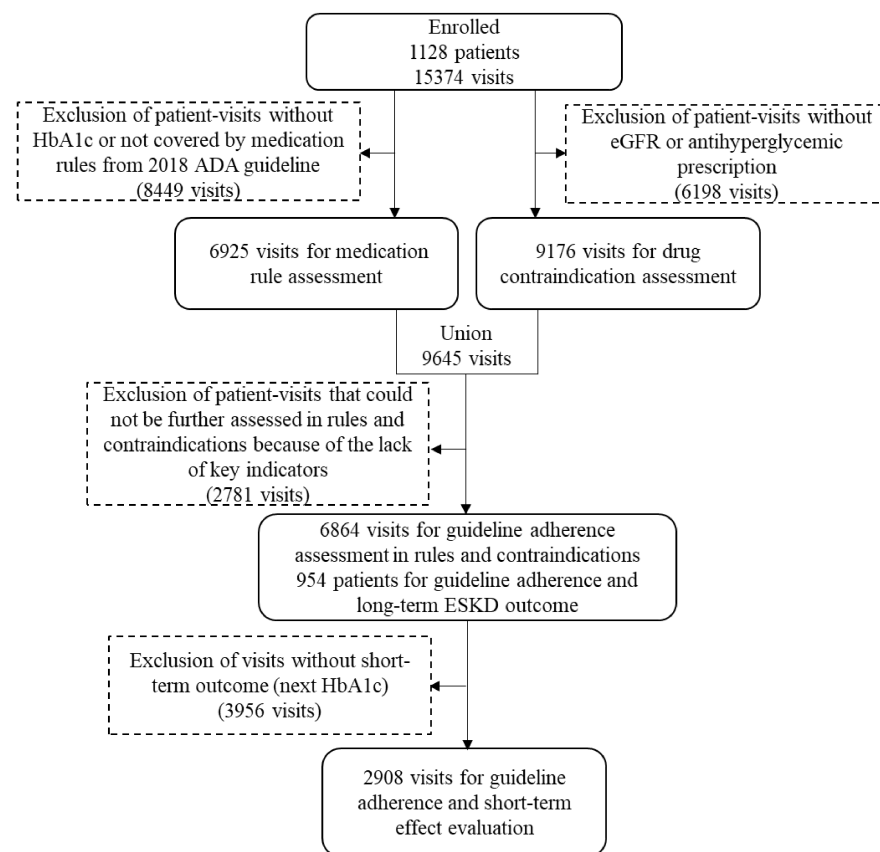

**Figure S3** The relationship between the patient's adherence rate and ESKD occurring rate for all patients. Six graphs represent the adherence to ADA (A, B, C) or Chinese guidelines (D, E, F) for antihyperglycemic therapy, hypertension control and lipid management, respectively. Numbers on the broken line represent the

number of patients in the every 10% or 20% adherence rate interval. Abbreviations: ADA, American Diabetes Association guideline; CHN, Chinese guideline.

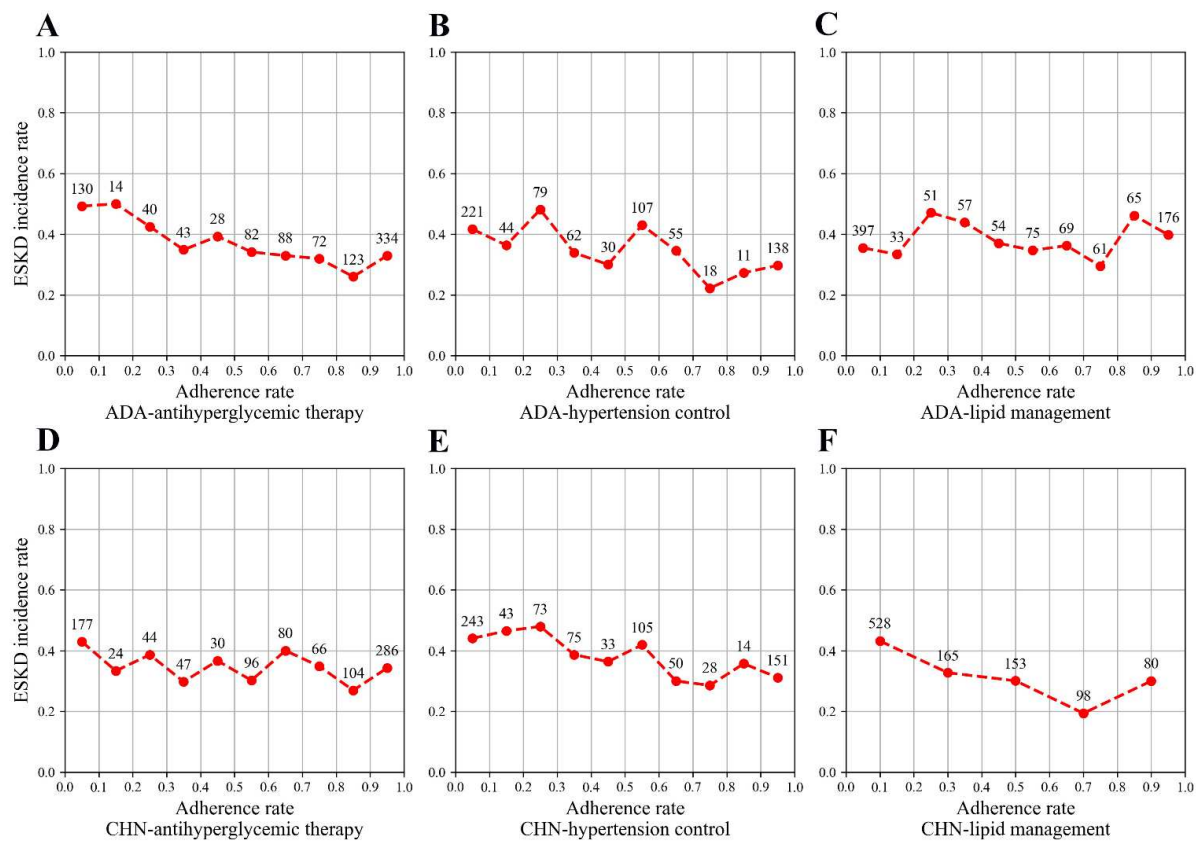

**Figure S4** The relationship between the patient's adherence rate and ESKD occurring rate for patients with visit number of 5 or greater. Six graphs represent the adherence to ADA (A, B, C) or Chinese guidelines (D, E, F) for antihyperglycemic therapy, hypertension control and lipid management, respectively. Numbers on

the broken line represent the number of patients in the every 10% or 20% adherence rate interval. Abbreviations: ADA, American Diabetes Association guideline; CHN, Chinese guideline.

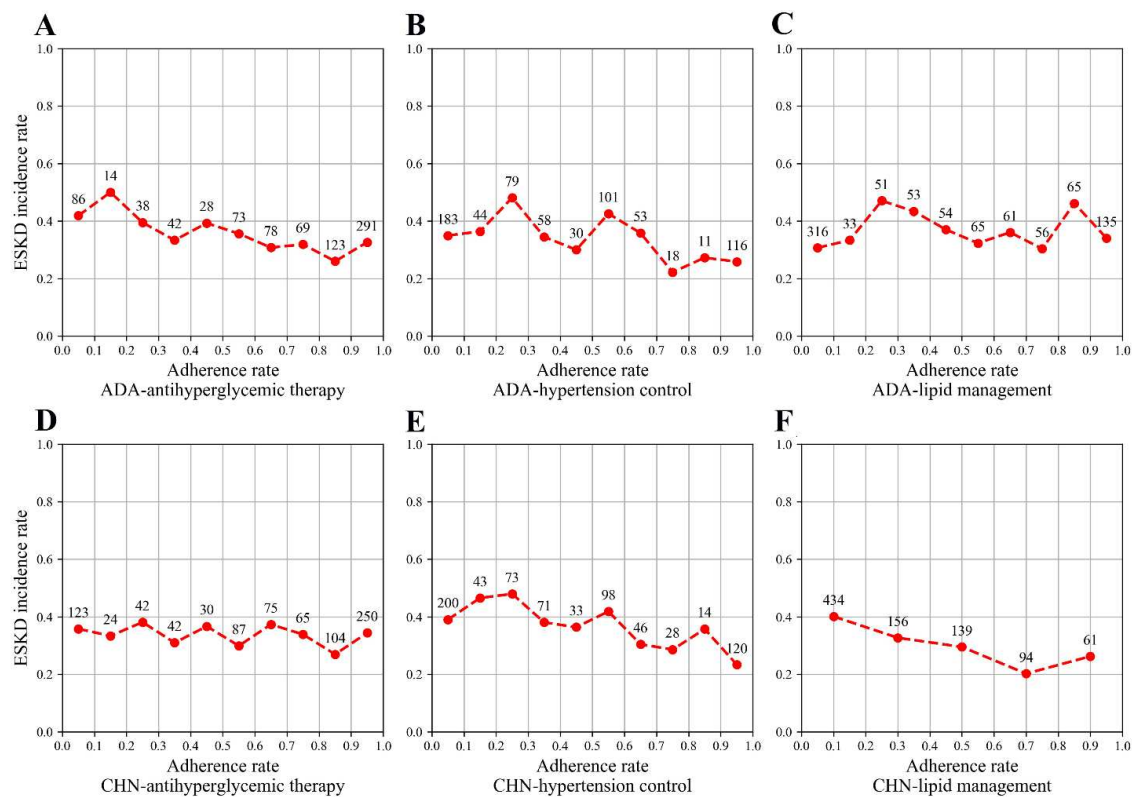

**Figure S5** The relationship between the patient's adherence rate and ESKD occurring rate according to hypertension control from different versions of ADA



guideline. The adherence rate to different guideline versions was calculated according to the visit time of each patient, and then analysis the relationship between patient's adherence rate and ESKD occurrence rate.

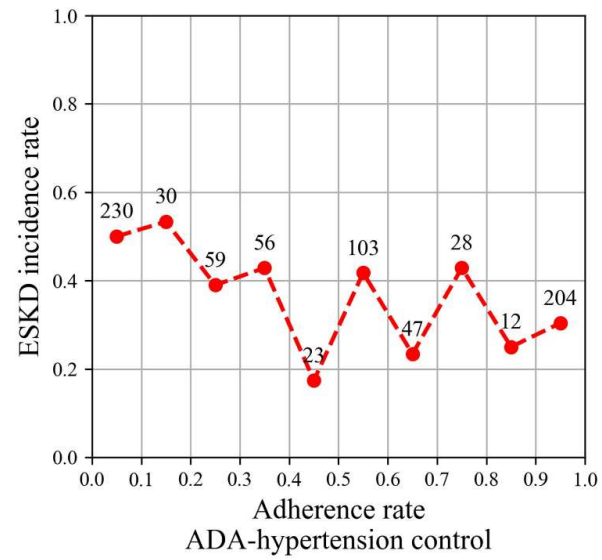

Supplement: bmjdrc-2019-001166supp001.pdf [file bmjdrc-2019-001166supp001.pdf]
